# Supplementary material
Source: PubMed Central journal article supplement (PMC4322189)
Supplement: supp_bgu241_2012_NSAID_paper_SupFig2_IHC.pdf [file supp_bgu241_2012_NSAID_paper_SupFig2_IHC.pdf]

**Supplementary Figure 2.**

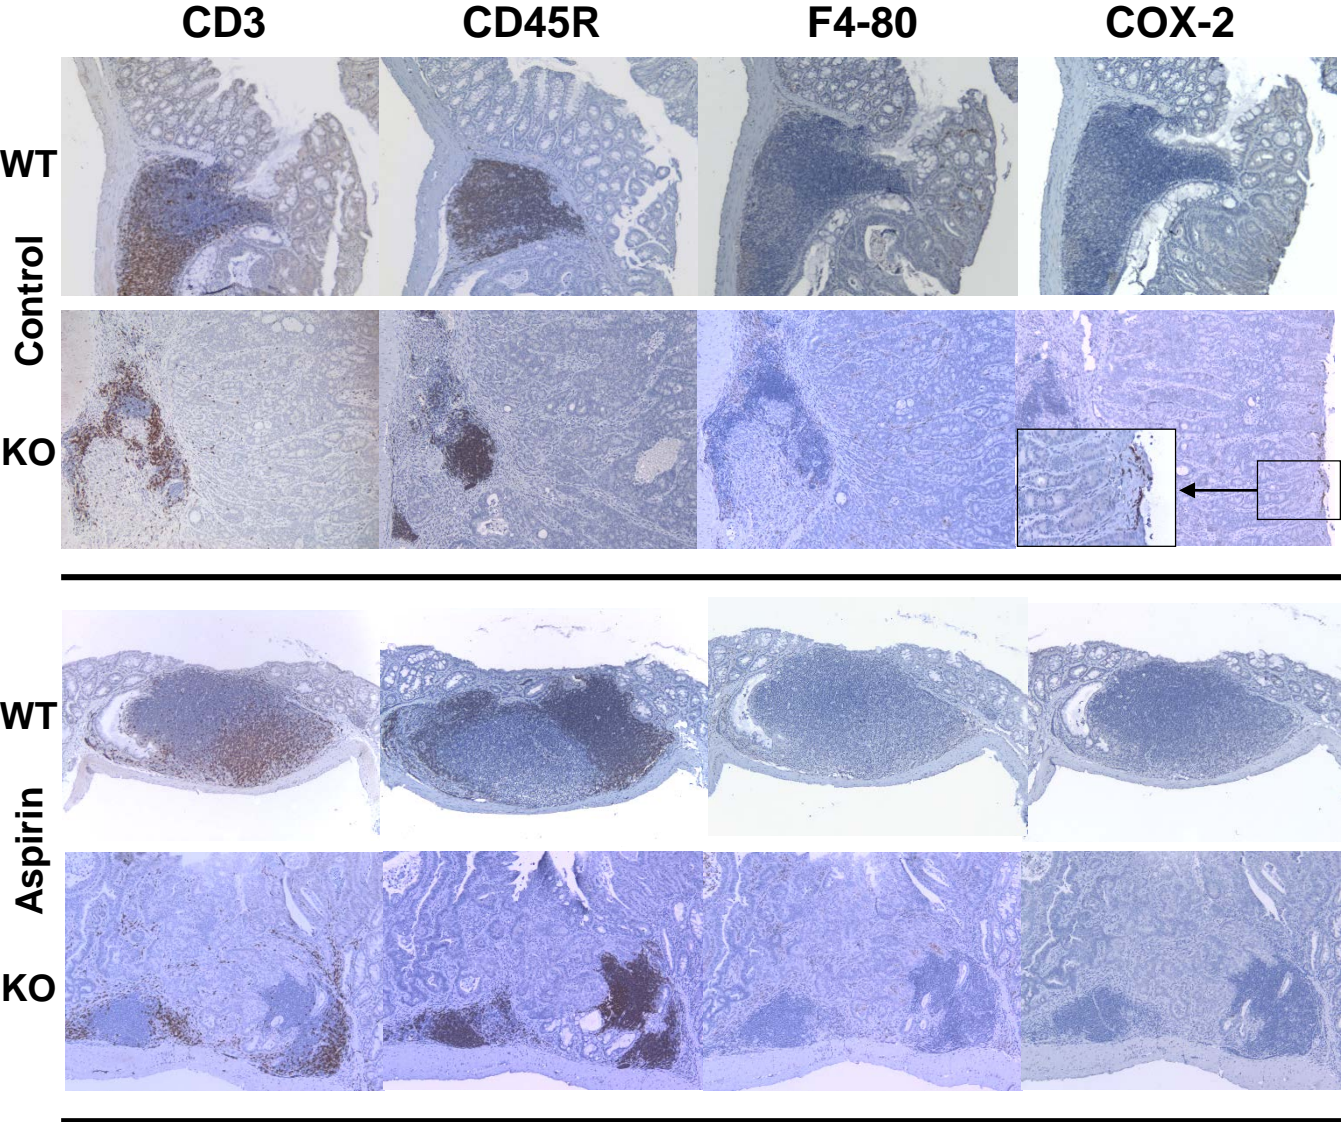

**Supplementary Figure 2.** Immunohistochemical staining for CD3, CD45R/B220, F4-80, and COX-2 in representative lymphoid aggregates collected from wild-type (WT) or knockout (KO) mice fed a regular AIN-76A diet (control) or an aspirin-, celecoxib-, or sulindac-containing diet (10x magnification). A representative picture (KO mouse treated with control diet, insert) demonstrates the sub-epithelial tumor stromal cell staining for COX-2 found in tumors collected from the study (40x magnification).



Supplementary Figure 2.

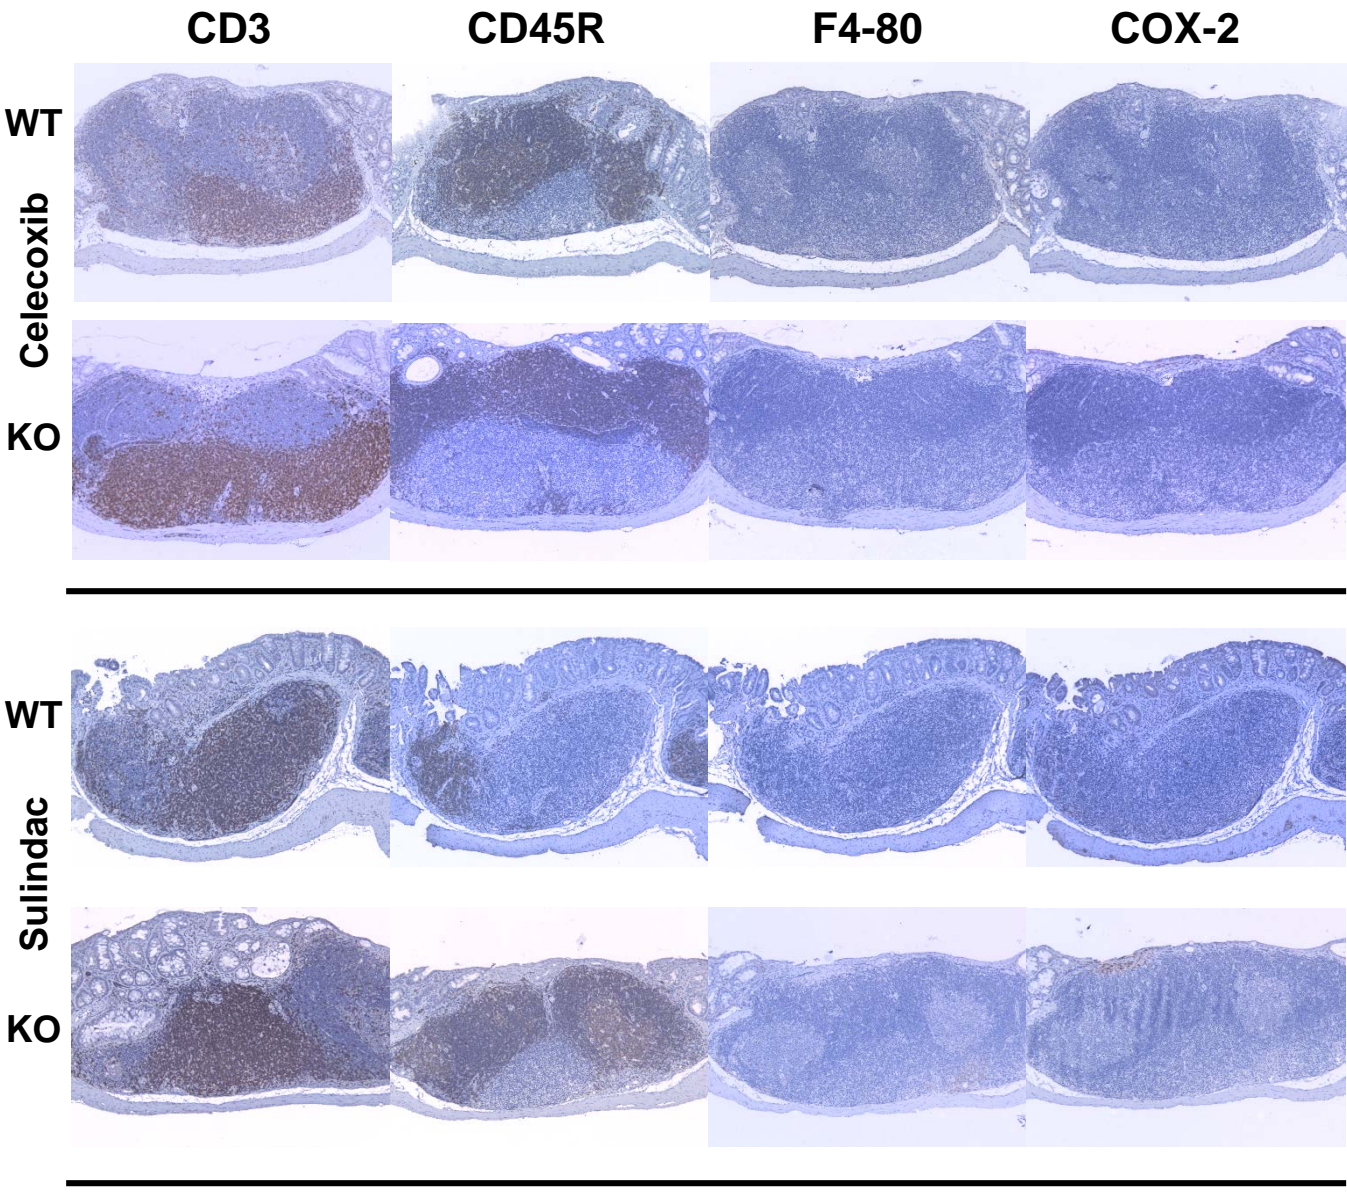

Supplementary Figure 2, Continued.
